# Supplementary material
Source: Springer Nature journal article supplement (https://www.springermedizin.de/resource/supplementary/13054_2010_8861_MOESM1_ESM.pdf/9732768)

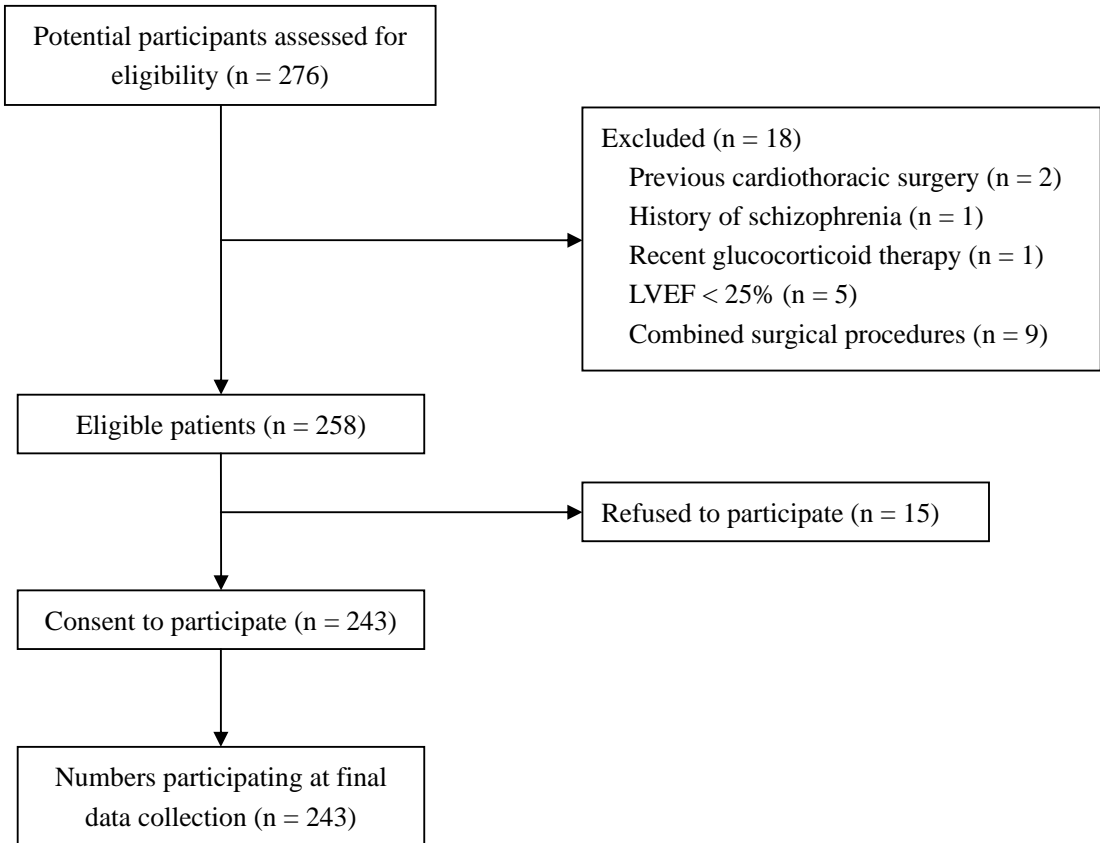

Supplement: MOESM1 [file 9732768]
